# Supplementary material
Source: PubMed Central journal article supplement (PMC3955959)

## Supplementary Methods

### Computing 95% confidence regions for (TPR, FPR) and (PPV, NPV).

The details of getting point estimations and 95% confidence regions for paired true positive ratio (TPR), false positive ratio (FPR) and positive predictive value (PPV), negative predictive value (NPV) are described as follows. Patients with success treatment outcomes are assigned as the positive class and patients with failure treatment outcomes are assigned as negative class. A true positive means identifying a treatment success correctly. By definition of (TPR, FPR), the point estimates can be obtained by the following formula.

$$\hat{TPR} = \# \text{ of True Positive} / N_p$$

$$\hat{FPR} = \# \text{ of False Positive} / N_N,$$

where  $N_p$  ( $N_N$ ) denote the number of positives (negatives). Since the data from the patient with treatment success and treatment failure outcome are independent, we have  $cov(TPR, FPR) = 0$ . Variance of  $\hat{TPR}$  and  $\hat{FPR}$  can be obtained by the normal approximation to a binomial distribution.

$$Var(\hat{TPR}) = \hat{TPR}(1 - \hat{TPR}) / \text{total \# of patients},$$

$$Var(\hat{FPR}) = \hat{FPR}(1 - \hat{FPR}) / \text{total \# of patients}.$$

Hence,  $\begin{pmatrix} \hat{TPR} \\ \hat{FPR} \end{pmatrix}$  is asymptotically distributed as Normal  $\left( \begin{pmatrix} \hat{TPR} \\ \hat{FPR} \end{pmatrix}, \begin{pmatrix} var(\hat{TPR}) & 0 \\ 0 & var(\hat{FPR}) \end{pmatrix} \right)$ .

And the 95% confidence region for (TPR, FPR) can be plotted using ellipse package in R.

Similarly, by the definition of (PPV, NPV), their point estimates can be obtained by the following formula.

$$\hat{PPV} = \rho \hat{TPR} / \{ \rho \hat{TPR} + (1 - \rho) \hat{FPR} \}$$

$$\hat{NPV} = (1 - \rho)(1 - \hat{FPR}) / \{ (1 - \rho) \hat{FPR} + \rho(1 - \hat{TPR}) \},$$

where  $\rho$  is the treatment success rate of the treatment in the disease population. We used  $\rho = 0.8$  according to (1).

Since we have asymptotic distribution for  $(TPR, FPR)$ , applying multivariate delta method gives us asymptotic distribution of  $(\text{logit}(\hat{PPV}), \text{logit}(\hat{NPV}))$  as:

$$\text{Normal} \left( \begin{pmatrix} \text{logit}(\hat{PPV}) \\ \text{logit}(\hat{NPV}) \end{pmatrix}, \begin{pmatrix} \frac{1 - \hat{TPR}}{N_p \hat{TPR}} + \frac{1 - \hat{FPR}}{N_N \hat{FPR}} & -\frac{1}{N_p} - \frac{1}{N_N} \\ -\frac{1}{N_p} - \frac{1}{N_N} & \frac{\hat{TPR}}{N_p(1 - \hat{TPR})} + \frac{\hat{FPR}}{N_N(1 - \hat{FPR})} \end{pmatrix} \right),$$

where  $\text{logit}(p) = \log(p/(1-p))$  for  $0 < p < 1$ . The detailed proof can be found in (2).

The 95% confidence region for  $(\text{logit}(\hat{PPV}), \text{logit}(\hat{NPV}))$  can be plotted using ellipse package in R. And the 95% confidence interval for (PPV, NPV) can be obtained by take inverse logit transformation of the 95% confidence interval of  $(\text{logit}(\hat{PPV}), \text{logit}(\hat{NPV}))$ .

Reference:

Steidl C, Lee T, Shah SP, Farinha P et al. Tumor-associated macrophages and survival in classic Hodgkin's lymphoma. *N Engl J Med* 2010 Mar 11;362(10):875-85.

Pepe MS. *The Statistical Evaluation of Medical Tests for Classification and Prediction*. 1<sup>st</sup> ed. Oxford New York; 2003.

**Supplementary Table 3: Summary of GI50 Values of NCI 60 cell lines for commonly used drug regimens in cancer treatment**

| <b>Drug Name</b>       | <b>NSC No.</b> | <b><math>\Delta_{GI50}</math> Value</b> | <b>Ten distinct GI50 Value</b> | <b>Applicable to MPI model</b> |
|------------------------|----------------|-----------------------------------------|--------------------------------|--------------------------------|
| 5-fluorouracil         | 19893          | 2.666                                   | Yes                            | Yes                            |
| adriamycin/doxorubicin | 123127         | 3.338                                   | Yes                            | Yes                            |
| asparaginase           | 109229         | 3.553                                   | Yes                            | Yes                            |
| bleomycin              | 125066         | 3.361                                   | Yes                            | Yes                            |
| busulfan               | 750            | 0.455                                   | Yes                            | No                             |
| carboplatin            | 241240         | 0.935                                   | Yes                            | No                             |
| cisplatin              | 119875         | 1.616                                   | Yes                            | Yes                            |
| cyclophosphamide       | 26271          | 0.451                                   | Yes                            | No                             |
| cytarabine             | 63878          | 3.96                                    | Yes                            | Yes                            |
| dacarbazine            | 45388          | 1.004                                   | Yes                            | Yes                            |
| daunorubicin           | 82151          | 2.89                                    | Yes                            | Yes                            |
| dexamethasone          | 34521          | 4                                       | No                             | No                             |
| docetaxel              | 628503         | 3.635                                   | Yes                            | Yes                            |
| epirubicin             | 256942         | 2.589                                   | Yes                            | Yes                            |
| etoposide              | 141540         | 2.707                                   | Yes                            | Yes                            |
| etoposide              | 141540         | 2.707                                   | Yes                            | Yes                            |
| goserelin              | 606864         | NA                                      | NA                             | NA                             |
| Idarubicin             | 256439         | 2.863                                   | Yes                            | Yes                            |
| megesterol             | 71423          | 1.863                                   | Yes                            | Yes                            |
| mercaptopurine         | 755            | 3.026                                   | Yes                            | Yes                            |
| methotrexate           | 740            | 3.731                                   | Yes                            | Yes                            |
| paclitaxel             | 125973         | 3.045                                   | Yes                            | Yes                            |
| prednisolone           | 63549          | 3.883                                   | Yes                            | Yes                            |
| rituximab              | 687451         | NA                                      | NA                             | NA                             |
| tamoxifen              | 180973         | 0.629                                   | Yes                            | No                             |
| thalidomide            | 66847          | 0                                       | No                             | No                             |
| thioguanine            | 752            | 2.658                                   | Yes                            | Yes                            |
| valsopodar             | 648265         | 1.465                                   | Yes                            | Yes                            |
| velcade                | 681239         | 1.883                                   | Yes                            | Yes                            |
| vinblastine            | 49842          | 3.07                                    | Yes                            | Yes                            |
| vincristine            | 67574          | 3.243                                   | Yes                            | Yes                            |

NSC No.: National Service Center Number

**Supplementary Table 4: Point estimates for pairs of (TPR, FPR) and (PPV, NPV) for sensitivity scores with 86<sup>th</sup> percentiles and mean of all scores cutoff points for study GSE16446**

| <b>Cutoff point</b> | <b>86<sup>th</sup> percentile</b> | <b>Mean</b>  |
|---------------------|-----------------------------------|--------------|
| (TPR, FPR)          | (0.25, 0.12)                      | (0.63, 0.46) |
| (PPV, NPV)          | (0.25, 0.87)                      | (0.18, 0.90) |

## Dichotomized Predictors for Hodgkin’s Lymphoma (GSE17920)

We used three different cutoffs to dichotomize SS: 1) the 20<sup>th</sup> percentile of all scores, which is the historical rate of treatment success for Hodgkin’s lymphoma; 2) the 30<sup>th</sup> percentile of all scores, which is the rate of treatment success for the patients in GSE17920; and 3) the mean of all scores, which is the default cutoff point used by MPI. We summarized the point estimates for (TPR, FPR) and (PPV, NPV) in **Supplementary Tables 5.1 and 5.2**; we plotted their 95% confidence regions in **Supplementary Figure 1A,B**. For comparison purposes, the 95% confidence regions for (TPR, FPR) and (PPV, NPV) for a prediction model using the international prognostic score (IPS) were also plotted in **Supplementary Figure 1**. We used 3 as the cutoff for IPS because historically about 20% percent of Hodgkin’s patients have IPS > 3. The dichotomized prediction models using SS alone did not perform better than chance (i.e., the 95% confidence regions overlap the gray region representing the null hypothesis). Using the 30<sup>th</sup> percentile as the cutoff, 4 patients (out of 130) were reclassified, but the NRI is not greater than zero (**Table 6**; NRI: -0.03, 95% CI: -0.10–0.02).

We used the same cutoffs to dichotomize CS. The point estimates for (TPR, FPR) and (PPV, NPV) pairs are summarized in **Supplementary Tables 5.1 and 5.2**; the 95% confidence regions are plotted in **Supplementary Figure 1C, D**. The 95% confidence regions show that CS performed significantly better than chance (solid blue ellipses and all orange ellipses fall outside the grey areas in panels C and D of **Supplementary Figure 1**). The 95% confidence regions based on a prediction model using IPS>3 are also plotted for comparison. Compared to the predictions based on IPS > 3, however, CS did not perform significantly better (none of the ellipses are totally above the green ellipse in **Supplementary Figure 1**). By this criterion, these models are equivalent to the prediction model based on IPS>3, whose 95% confidence region is also not clearly better than chance. Using the 30<sup>th</sup> percentile as the cutoff, 18 patients (out of 130) were reclassified comparing predictions based on only clinical features to CS, and the NRI is not greater than zero (**Table 8**; NRI: -0.04, 95% CI: -0.19–0.12).

In addition, since the dotted lines and dotted ellipse in **Supplementary Figure 1** are close to (or overlap) the corresponding solid lines and solid ellipse respectively, and the statistical test results are similar for original scores and adjusted scores (**Table 5** and **Table 6**), the CS and SS based on the original and adjusted gene expression values provide similar prediction results. We conclude that CS and SS are robust to the batch effects present in this instance.

**Supplementary Table 5.1: Point estimates for pairs of (TPR, FPR) for sensitive/combined scores based on original GE and adjusted GE with 20 percentiles, 30 percentiles and means of scores cutoff points for study GSE17920**

| Cutoff point      | Based on Original GE        |                             |              | Based on Adjusted GE        |                             |              |
|-------------------|-----------------------------|-----------------------------|--------------|-----------------------------|-----------------------------|--------------|
|                   | 20 <sup>th</sup> percentile | 30 <sup>th</sup> percentile | Mean         | 20 <sup>th</sup> percentile | 30 <sup>th</sup> percentile | Mean         |
| Combined Score    | (0.85, 0.66)                | (0.78, 0.50)                | (0.62, 0.32) | (0.86, 0.66)                | (0.78, 0.50)                | (0.60, 0.34) |
| Sensitivity Score | (0.86, 0.74)                | (0.75, 0.58)                | (0.61, 0.42) | (0.86, 0.74)                | (0.75, 0.58)                | (0.57, 0.45) |

**Supplementary Table 5.2: Point estimates for pairs of (PPV, NPV) for sensitive/combined scores based on original GE and adjusted GE with 20 percentiles, 30 percentiles and means of scores cutoff points for study GSE17920**

| Cutoff point      | Based on Original GE        |                             |              | Based on Adjusted GE        |                             |              |
|-------------------|-----------------------------|-----------------------------|--------------|-----------------------------|-----------------------------|--------------|
|                   | 20 <sup>th</sup> percentile | 30 <sup>th</sup> percentile | Mean         | 20 <sup>th</sup> percentile | 30 <sup>th</sup> percentile | Mean         |
| Combined Score    | (0.83, 0.37)                | (0.86, 0.37)                | (0.89, 0.31) | (0.84, 0.38)                | (0.86, 0.37)                | (0.87, 0.29) |
| Sensitivity Score | (0.82, 0.27)                | (0.84, 0.29)                | (0.85, 0.27) | (0.82, 0.27)                | (0.82, 0.25)                | (0.83, 0.24) |

**Supplementary Table 6: Treatment Outcomes by different sample centers for study GSE17920 (Hodgkin's Lymphoma)**

|                | Overall<br>(N=130) |      | Vancouver<br>(N=100) |      | Nebraska<br>(N=30) |      | Chi2-test |
|----------------|--------------------|------|----------------------|------|--------------------|------|-----------|
|                | N                  | %    | N                    | %    | N                  | %    | P Value   |
| <b>Success</b> | 92                 | 70.7 | 82                   | 82.0 | 10                 | 33.3 | <0.0001   |
| <b>Failure</b> | 38                 | 29.3 | 18                   | 18.0 | 20                 | 66.7 |           |

**Supplementary Table 7: Reclassification Table for the prediction performance without and with the sensitivity score for study GSE17920 (Hodgkin's Lymphoma)\***

| Age+Stage      | Age+Stage+Sensitivity Score<br>NRI: -0.03, 95% CI: (-0.10, 0.02) |                        | Combined Score<br>NRI: -0.04, 95% CI: (-0.19, 0.12) |                        | Total                   |
|----------------|------------------------------------------------------------------|------------------------|-----------------------------------------------------|------------------------|-------------------------|
|                | Failure                                                          | Success                | Failure                                             | Success                |                         |
| <b>Failure</b> | N=37<br>(N=18 Success)                                           | N=2<br>(N=1 Success)   | N=30<br>(N=14 Success)                              | N=9<br>(N=5 Success)   | N=39<br>(N=19 Success)  |
| <b>Success</b> | N=2<br>(N=2 Success)                                             | N=89<br>(N=71 Success) | N=9<br>(N=6 Success)                                | N=82<br>(N=67 Success) | N=91<br>(N=73 Success)  |
| <b>Total</b>   | N=39<br>(N=20 Success)                                           | N=91<br>(N=72 Success) | N=39<br>(N=20 Success)                              | N=91<br>(N=72 Success) | N=130<br>(N=92 Success) |

\*Cutoff point: 30<sup>th</sup> percentile; NRI: Net reclassification improvement; CI: confidence interval.

**Supplementary Table 8: Univariate Cox regression of MPI sensitivity score related to disease free survival for study GSE10255 (Acute Lymphoblastic Leukemia)\***

| Parameter                       | HR   | 95% CI      | P-value |
|---------------------------------|------|-------------|---------|
| Sensitivity score (continuous)  | 0.99 | (0.97-1.02) | 0.75    |
| Sensitivity score (categorized) |      |             |         |
| Intermediate vs. Good           | 0.67 | (0.20-2.22) | 0.51    |
| Poor vs. Good                   | 1.47 | (0.39-5.49) | 0.57    |

\*HR: hazard ratio; CI: confidence interval.

**Supplementary Figure 1: 95% Confidence Regions of paired (FPR, TPR), Panels A and C, and (PPV, NPV), Panels B and D, for continuous sensitivity and combined score based on original GE (solid ellipses) and adjusted GE (dotted ellipses) with three different cutoff points for study GSE17920 (Hodgkin's Lymphoma)**

Cutoff points: 1) 20<sup>th</sup> percentile (the population response rate, red ellipses); 2) 30<sup>th</sup> percentile (the response rate of GSE17920 study, orange ellipses) 3) mean (the standard cutoff point used by MPI, blue ellipses).

Green ellipse: the prediction model based on international prognostic score (IPS) greater than 3.

Grey Area: The region for the prediction made by chance.

The solid black line and dotted black line are the ROC curves for prediction score based on original and adjusted gene expressions respectively. The solid green line is the ROC curves for IPS.

FPR: False positive Rate; TPR: True Positive Rate; PPV: Positive Predictive Value; NPV: Negative Predictive Value.

Note: The dotted red ellipse and the solid red ellipse are overlapped for Panel A and B. The dotted orange ellipse and the solid orange ellipse are overlapped for Panel C and D.

**A: 95% Confidence Regions for (FPR, TPR)\_Sensitivity Score**

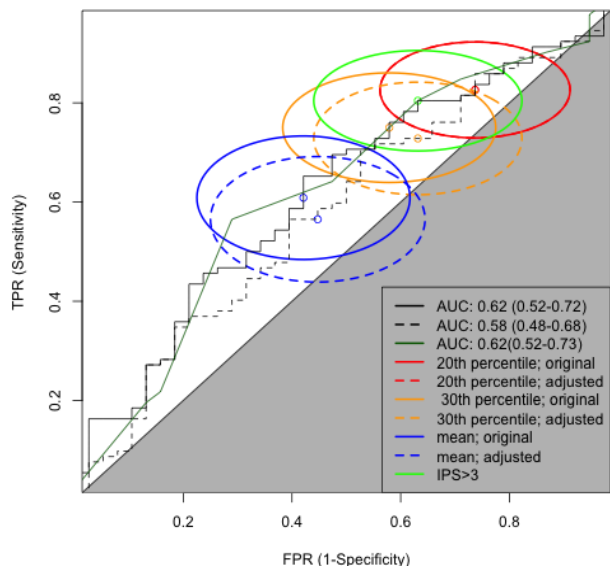

**B: 95% Confidence Region for (PPV, NPV)\_Sensitivity Score**

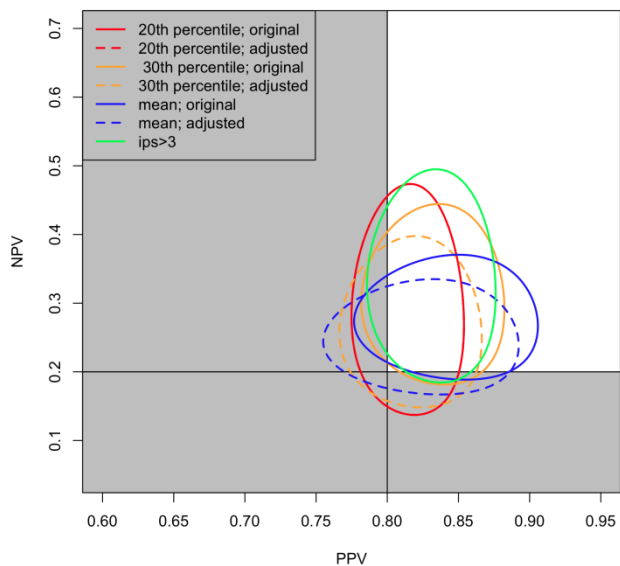

**C: 95% Confidence Regions for (FPR, TPR)\_Combined Score**

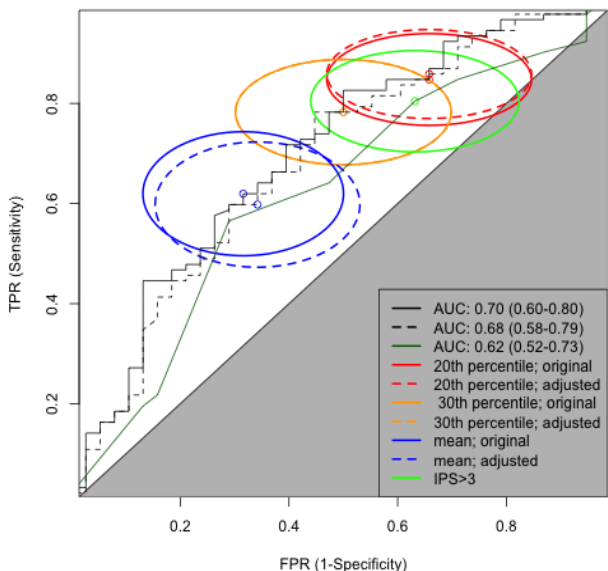

**D: 95% Confidence Region for (PPV, NPV)\_Combined Score**

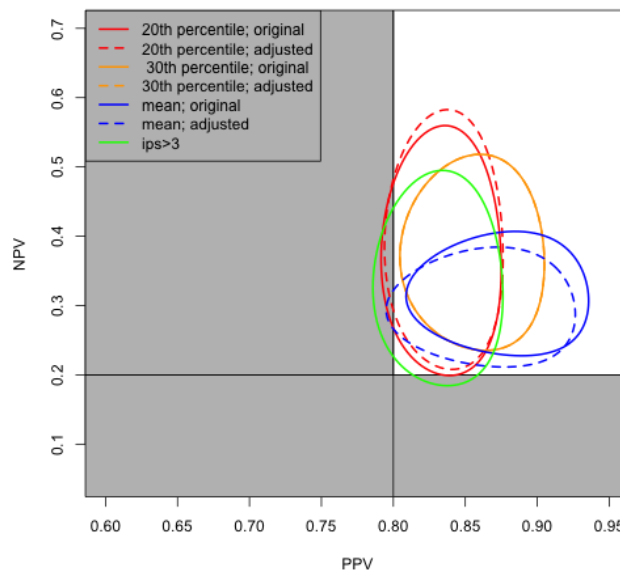

Supplement: supp_djt202_jnci_JNCI_12_1435_s03.pdf [file supp_djt202_jnci_JNCI_12_1435_s03.pdf]
