# Supplementary material
Source: PubMed Central journal article supplement (PMC3955959)
Supplement: supp_djt202_jnci_JNCI_12_1435_s01.pdf [file supp_djt202_jnci_JNCI_12_1435_s01.pdf]

**Supplementary Table 1. 203 studies passed the automatic filter in GEO**

| GEO Series        | Cancer Study | Over 100 Patient | treatment inf | clinical outcome | cancer type           | platform             |
|-------------------|--------------|------------------|---------------|------------------|-----------------------|----------------------|
| GSE17920          | Yes          | Yes              | Yes           | Yes              | hodgkin lymphoma      | GPL570               |
| GSE16446          | Yes          | Yes              | Yes           | Yes              | Breast Cancer         | GPL570               |
| GSE4779           | Yes          | Yes              | Yes           | Yes              | breast cancer         | GPL570               |
| GSE20194          | Yes          | Yes              | Yes           | Yes              | Breast Cancer         | GPL96                |
| GSE20271          | Yes          | Yes              | Yes           | Yes              | Breast Cancer         | GPL96                |
| GSE19615          | Yes          | Yes              | Yes           | Yes              | breast cancer         | GPL570               |
| GSE12093          | Yes          | Yes              | Yes           | Yes              | Breast Cancer         | GPL96                |
| GSE17705          | Yes          | Yes              | Yes           | Yes              | Breast Cancer         | GPL96                |
| GSE2990           | Yes          | Yes              | Yes           | Yes              | Breast Cancer         | GPL96                |
| GSE6532           | Yes          | Yes              | Yes           | Yes              | Breast Cancer         | GPL96and97and570     |
| GSE1456           | Yes          | Yes              | Yes           | Yes              | Breast Cancer         | GPL96and97           |
| GSE17538/GSE17536 | Yes          | Yes              | Yes           | Yes              | Colon Cancer          | GPL570               |
| GSE9891/GSE9899   | Yes          | Yes              | Yes           | Yes              | ovarian cancer        | GPL570               |
| GSE24080/GSE4581  | Yes          | Yes              | Yes           | Yes              | Multiple myeloma      | GPL570               |
| GSE2351           | Yes          | Yes              | Yes           | Yes              | ALL                   | GPL96                |
| GSE10255          | Yes          | Yes              | Yes           | Yes              | ALL                   | GPL96                |
| GSE12995          | Yes          | Yes              | Yes           | Yes              | ALL                   | GPL96                |
| GSE11877          | Yes          | Yes              | Yes           | Yes              | Pediatric ALL         | GPL570               |
| GSE12417          | Yes          | Yes              | Yes           | Yes              | AML                   | GPL96and570          |
| GSE10846          | Yes          | Yes              | Yes           | Yes              | DLBCL                 | GPL570               |
| GSE11318          | Yes          | Yes              | Yes           | Yes              | DLBCL                 | GPL570               |
| GSE17372/GSE10864 | Yes          | Yes              | Yes           | Yes              | AIDS related lymphoma | GPL570               |
| GSE635            | Yes          | Yes              | Yes           | NA               | ALL                   | GPL96                |
| GSE4922           | Yes          | Yes              | Yes           | NA               | Breast Cancer         | GPL96and97           |
| GSE4475           | Yes          | Yes              | NA            | Yes              | DLBCL                 | GPL96                |
| GSE14468          | Yes          | Yes              | NA            | Yes              | AML                   | GPL570               |
| GSE14333          | Yes          | Yes              | NA            | Yes              | colorectal cancer     | GPL570               |
| GSE11121          | Yes          | Yes              | NA            | Yes              | Breast Cancer         | GPL96                |
| GSE4271           | Yes          | Yes              | NA            | Yes              | glioma                | GPL96and97           |
| GSE2603           | Yes          | Yes              | NA            | Yes              | Breast Cancer         | GPL96                |
| GSE21124/GSE21122 | Yes          | Yes              | NA            | Yes              | Soft-tissue sarcoma   | GPL96                |
| GSE7390           | Yes          | Yes              | NA            | Yes              | breast cancer         | GPL96                |
| GSE15460/GSE15459 | Yes          | Yes              | NA            | Yes              | Gastric Cancer        | GPL570               |
| GSE12276          | Yes          | Yes              | NA            | Yes              | breast cancer         | GPL570               |
| GSE3494           | Yes          | Yes              | NA            | Yes              | Breast Cancer         | GPL96and97           |
| GSE21653          | Yes          | Yes              | NA            | Yes              | breast cancer         | GPL570               |
| GSE13041          | Yes          | Yes              | NA            | Yes              | glioblastomas         | GPL96/GPL570/GPL8300 |
| GSE16131          | Yes          | Yes              | NA            | Yes              | Follicular Lymphoma   | GPL96and97           |
| GSE2034           | Yes          | Yes              | NA            | Yes              | Breast Cancer         | GPL96                |
| GSE10320          | Yes          | Yes              | NA            | Yes              | FHWT                  | GPL96                |

| GEO Series        | Cancer Study | Over 100 Patient | treatment inf | clinical outcome | cancer type          | platform       |
|-------------------|--------------|------------------|---------------|------------------|----------------------|----------------|
| GSE15695          | Yes          | Yes              | NA            | NA               | multiple myeloma     | GPL570         |
| GSE6401           | Yes          | Yes              | NA            | NA               | multiple myeloma     | GPL96          |
| GSE5460           | Yes          | Yes              | NA            | NA               | Breast Cancer        | GPL570         |
| GSE20916          | Yes          | Yes              | NA            | NA               | colon tumor          | GPL570         |
| GSE19069          | Yes          | Yes              | NA            | NA               | lymphomas            | GPL570         |
| GSE8218           | Yes          | Yes              | NA            | NA               | prostate cancer      | GPL96          |
| GSE17951          | Yes          | Yes              | NA            | NA               | prostate cancer      | GPL570         |
| GSE13294          | Yes          | Yes              | NA            | NA               | colorectal cancers   | GPL570         |
| GSE6477           | Yes          | Yes              | NA            | NA               | plasma cell neoplasm | GPL96          |
| GSE10358          | Yes          | Yes              | NA            | NA               | AML                  | GPL570         |
| GSE21050/GSE16382 | Yes          | Yes              | NA            | NA               | soft tissue sarcomas | GPL570         |
| GSE21349          | Yes          | Yes              | NA            | NA               | multiple myeloma     | GPL570         |
| GSE3218           | Yes          | Yes              | NA            | NA               | germ cell tumors     | GPL96and97     |
| GSE19987          | Yes          | Yes              | NA            | NA               | Pheochromocytoma     | GPL96and571    |
| GSE10780          | Yes          | Yes              | NA            | NA               | Breast Cancer        | GPL570         |
| GSE23980          | Yes          | Yes              | NA            | NA               | Soft-tissue sarcoma  | GPL570         |
| GSE13351          | Yes          | Yes              | NA            | NA               | ALL                  | GPL570         |
| GSE13425/GSE635   | Yes          | Yes              | NA            | NA               | ALL                  | GPL96          |
| GSE17855          | Yes          | Yes              | NA            | NA               | AML                  | GPL570         |
| GSE19784          | Yes          | Yes              | NA            | NA               | Multiple myeloma     | GPL570         |
| GSE17459          | Yes          | Yes              | NA            | NA               | ALL                  | GPL570/96      |
| GSE15347/GSE14471 | Yes          | Yes              | NA            | NA               | AML                  | GPL96          |
| GSE15434          | Yes          | Yes              | NA            | NA               | AML-NK               | GPL570         |
| GSE13204/GSE13159 | Yes          | Yes              | NA            | NA               | Leukemia             | GPL570         |
| GSE17703          | Yes          | Yes              | NA            | NA               | ALL                  | GPL571         |
| GSE14062          | Yes          | Yes              | NA            | NA               | ALL and AML          | GPL570         |
| GSE15061          | Yes          | Yes              | NA            | NA               | AML                  | GPL570         |
| GSE16015          | Yes          | Yes              | NA            | NA               | AML                  |                |
| GSE16122/GSE13591 | Yes          | Yes              | NA            | NA               | multiple myeloma     | GPL96          |
| GSE11135          | Yes          | Yes              | NA            | NA               | AML                  | GPL570         |
| GSE6891           | Yes          | Yes              | NA            | NA               | AML                  | GPL570         |
| GSE1159           | Yes          | Yes              | NA            | NA               | ALL                  | GPL96          |
| GSE7307           | Yes          | Yes              | NA            | NA               | different diseases   | GPL570         |
| GSE12630          | Yes          | Yes              | NA            | NA               | 14 different         | GPL96orGPL7820 |
| GSE10139          | Yes          | No               | Yes           | Yes              | CLL                  | GPL96/GPL570   |
| GSE20181          | Yes          | No               | Yes           | Yes              | Breast Cancer        | GPL96          |
| GSE5462           | Yes          | No               | Yes           | Yes              | Breast Cancer        | GPL96          |
| GSE18105          | Yes          | No               | Yes           | Yes              | colorectal cancer    | GPL570         |
| GSE6861           | Yes          | No               | Yes           | Yes              | breast cancer        | GPL1352        |
| GSE19188          | Yes          | No               | NA            | Yes              | NSCLC                | GPL570         |

| GEO Series | Cancer Study | Over 100 Patient | treatment inf | clinical outcome | cancer type                                           | platform         |
|------------|--------------|------------------|---------------|------------------|-------------------------------------------------------|------------------|
| GSE17907   | Yes          | No               | NA            | Yes              | Breast Cancer                                         | GPL570           |
| GSE4412    | Yes          | No               | NA            | Yes              | gliomas                                               | GPL96and97       |
| GSE19578   | Yes          | No               | NA            | NA               | gliomas                                               | GPL570           |
| GSE7055    | Yes          | No               | NA            | NA               | prostate cancer                                       | GPL571           |
| GSE19246   | Yes          | No               | NA            | NA               | DLBCL                                                 | GPL570           |
| GSE4290    | Yes          | No               | NA            | NA               | glioblastomas                                         | GPL570           |
| GSE21687   | Yes          | No               | NA            | NA               | ependymoma                                            | GPL570           |
| GSE14323   | Yes          | No               | NA            | NA               | HCC                                                   | GPL570           |
| GSE20565   | Yes          | No               | NA            | NA               | primary and secondary ovarian tumors                  | GPL570           |
| GSE9829    | Yes          | No               | NA            | NA               | hepatocellular carcinoma                              | GPL570           |
| GSE10072   | Yes          | No               | NA            | NA               | lung adenocarcinoma                                   | GPL96            |
| GSE6008    | Yes          | No               | NA            | NA               | ovarian cancer                                        | GPL96            |
| GSE14994   | Yes          | No               | NA            | NA               | ccRCC                                                 | GPL570           |
| GSE13319   | Yes          | No               | NA            | NA               | Leiomyoma                                             | GPL570           |
| GSE22529   | Yes          | No               | NA            | NA               | CLL                                                   | GPL96and97       |
| GSE23400   | Yes          | No               | NA            | NA               | ESCC                                                  | GPL96and97       |
| GSE14520   | Yes          | No               | NA            | NA               | HCC                                                   | GPL570/GPL3921   |
| GSE12195   | Yes          | No               | NA            | NA               | DLBCL                                                 | GPL570           |
| GSE16746   | Yes          | No               | NA            | NA               | B-CLL                                                 | GPL96            |
| GSE17306   | Yes          | No               | NA            | NA               | Multiple myeloma                                      | GPL570           |
| GSE10792   | Yes          | No               | NA            | NA               | ALL                                                   | GPL570           |
| GSE3912    | Yes          | No               | NA            | NA               | ALL                                                   | GPL96            |
| GSE5350    | Cell Lines   | NA               | NA            | NA               | MAQC                                                  | GPL570           |
| GSE4536    | Cell Lines   | NA               | NA            | NA               | glioblastomas                                         | GPL570           |
| GSE3284    | Cell Lines   | NA               | NA            | NA               | health men and women                                  | GPL96and97and570 |
| GSE2109    | Cell Lines   | NA               | NA            | NA               | Mixture of different diseases                         | GPL570           |
| GSE15396   | Cell Lines   | NA               | NA            | NA               | Peripheral blood mononuclear, DU145, and HCT116 cells | GPL570           |
| GSE8332    | Cell Lines   | NA               | NA            | NA               | Cell lines                                            | GPL570           |
| GSE10890   | Cell Lines   | NA               | NA            | NA               | Breast Cancer Cell Line                               | GPL570           |
| GSE10843   | Cell Lines   | NA               | NA            | NA               | Cancer cell line                                      | GPL570           |
| GSE12662   | Cell Lines   | NA               | NA            | NA               | cell lines                                            | GPL570           |
| GSE11582   | Cell Lines   | NA               | NA            | NA               | Lymphoblastoid Cell Lines                             | GPL96            |
| GSE9936    | Cell Lines   | NA               | NA            | NA               | MCF-7 human breast cancer cells                       | GPL96            |
| GSE5720    | Cell Lines   | NA               | NA            | NA               | NCI60 cell lines                                      | GPL96            |
| GSE4824    | Cell Lines   | NA               | NA            | NA               | lung cancer cell lines                                | GPL96and97and570 |
| GSE995     | Cell Lines   | NA               | NA            | NA               | acute myeloid leukemia cells                          | GPL96/GPL80      |
| GSE25429   | Cell Lines   | NA               | NA            | NA               | ovarian cancer cells                                  | GPL570/GPL3921   |
| GSE23120   | Cell Lines   | NA               | NA            | NA               | human lymphoblastoid cell lines                       | GPL570           |
| GSE16387   | No           |                  |               |                  |                                                       |                  |

| GEO Series        | Cancer Study | Over 100 Patient | treatment inf | clinical outcome | cancer type | platform |
|-------------------|--------------|------------------|---------------|------------------|-------------|----------|
| GSE24223          | No           |                  |               |                  |             |          |
| GSE20752          | No           |                  |               |                  |             |          |
| GSE24427          | No           |                  |               |                  |             |          |
| GSE24277/GSE23120 | No           |                  |               |                  |             |          |
| GSE11906          | No           |                  |               |                  |             |          |
| GSE22886          | No           |                  |               |                  |             |          |
| GSE21521          | No           |                  |               |                  |             |          |
| GSE22148          | No           |                  |               |                  |             |          |
| GSE19743          | No           |                  |               |                  |             |          |
| GSE16837          | No           |                  |               |                  |             |          |
| GSE21374          | No           |                  |               |                  |             |          |
| GSE13070          | No           |                  |               |                  |             |          |
| GSE19519          | No           |                  |               |                  |             |          |
| GSE19392          | No           |                  |               |                  |             |          |
| GSE20262          | No           |                  |               |                  |             |          |
| GSE19429          | No           |                  |               |                  |             |          |
| GSE20060          | No           |                  |               |                  |             |          |
| GSE14280          | No           |                  |               |                  |             |          |
| GSE17183          | No           |                  |               |                  |             |          |
| GSE16134          | No           |                  |               |                  |             |          |
| GSE16879          | No           |                  |               |                  |             |          |
| GSE10026          | No           |                  |               |                  |             |          |
| GSE18323          | No           |                  |               |                  |             |          |
| GSE17156          | No           |                  |               |                  |             |          |
| GSE16214          | No           |                  |               |                  |             |          |
| GSE13849          | No           |                  |               |                  |             |          |
| GSE13501          | No           |                  |               |                  |             |          |
| GSE16129          | No           |                  |               |                  |             |          |
| GSE16028          | No           |                  |               |                  |             |          |
| GSE11342          | No           |                  |               |                  |             |          |
| GSE11375          | No           |                  |               |                  |             |          |
| GSE12626          | No           |                  |               |                  |             |          |
| GSE14083          | No           |                  |               |                  |             |          |
| GSE13355          | No           |                  |               |                  |             |          |
| GSE10334          | No           |                  |               |                  |             |          |
| GSE13904          | No           |                  |               |                  |             |          |
| GSE13732          | No           |                  |               |                  |             |          |
| GSE12288          | No           |                  |               |                  |             |          |
| GSE11882          | No           |                  |               |                  |             |          |
| GSE10313          | No           |                  |               |                  |             |          |

| GEO Series | Cancer Study | Over 100 Patient | treatment inf | clinical outcome | cancer type | platform |
|------------|--------------|------------------|---------------|------------------|-------------|----------|
| GSE12649   | No           |                  |               |                  |             |          |
| GSE7638    | No           |                  |               |                  |             |          |
| GSE11909   | No           |                  |               |                  |             |          |
| GSE11907   | No           |                  |               |                  |             |          |
| GSE11908   | No           |                  |               |                  |             |          |
| GSE11917   | No           |                  |               |                  |             |          |
| GSE10760   | No           |                  |               |                  |             |          |
| GSE6095    | No           |                  |               |                  |             |          |
| GSE9676    | No           |                  |               |                  |             |          |
| GSE4302    | No           |                  |               |                  |             |          |
| GSE7895    | No           |                  |               |                  |             |          |
| GSE8507    | No           |                  |               |                  |             |          |
| GSE9006    | No           |                  |               |                  |             |          |
| GSE8650    | No           |                  |               |                  |             |          |
| GSE8052    | No           |                  |               |                  |             |          |
| GSE6296    | No           |                  |               |                  |             |          |
| GSE7123    | No           |                  |               |                  |             |          |
| GSE6613    | No           |                  |               |                  |             |          |
| GSE3846    | No           |                  |               |                  |             |          |
| GSE5060    | No           |                  |               |                  |             |          |
| GSE5258    | No           |                  |               |                  |             |          |
| GSE5406    | No           |                  |               |                  |             |          |
| GSE5281    | No           |                  |               |                  |             |          |
| GSE4607    | No           |                  |               |                  |             |          |
| GSE3526    | No           |                  |               |                  |             |          |
| GSE3790    | No           |                  |               |                  |             |          |
| GSE3307    | No           |                  |               |                  |             |          |
| GSE3365    | No           |                  |               |                  |             |          |
| GSE2770    | No           |                  |               |                  |             |          |
| GSE1145    | No           |                  |               |                  |             |          |
| GSE1133    | No           |                  |               |                  |             |          |
| GSE473     | No           |                  |               |                  |             |          |
