# Supplementary material
Source: PubMed Central journal article supplement (PMC3955959)
Supplement: supp_djt202_jnci_JNCI_12_1435_s02.pdf [file supp_djt202_jnci_JNCI_12_1435_s02.pdf]

**Supplementary Table 2. Summary of basic characteristics of 23+1 datasets**

| ID | GEO Series        | No. of Pat. | treatment                                                                                  | clinical outcome          | other clinical info | cancer type      | platform         |
|----|-------------------|-------------|--------------------------------------------------------------------------------------------|---------------------------|---------------------|------------------|------------------|
| 1  | GSE17920          | 130         | doxorubicin<br>bleomycin<br>vinblastine<br>dacarbazine                                     | relapse or not            | Yes                 | Hodgkin lymphoma | GPL570           |
| 2  | GSE16446          | 120         | epirubicin                                                                                 | pcr or npcr               | Yes                 | Breast Cancer    | GPL570           |
| 3  | GSE4779           | 102         | 5-fluorouracil<br>epirubicin<br>cyclophosphamide                                           | pcr or npcr               | Yes                 | Breast cancer    | GPL570           |
| 4  | GSE20194          | 230         | paclitaxel<br>5-fluorouracil<br>cyclophosphamide<br>doxorubicin                            | pcr or rd                 | Yes                 | Breast Cancer    | GPL96            |
| 5  | GSE20271          | 178         | paclitaxel<br>5-fluorouracil<br>doxorubicin<br>cyclophosphamide                            | pcr or rd                 | Yes                 | Breast Cancer    | GPL96            |
| 6  | GSE19615          | 115         | doxorubicin<br>cyclophosphamide<br>paclitaxel                                              | DMF time                  | Yes                 | Breast cancer    | GPL570           |
| 7  | GSE12093          | 136         | tamoxifen                                                                                  | DFS time                  | NA (Yes in paper)   | Breast Cancer    | GPL96            |
| 8  | GSE17705          | 298         | tamoxifen                                                                                  | relapse free survival     | Yes                 | Breast Cancer    | GPL96            |
| 9  | GSE2990           | 189         | tamoxifen                                                                                  | DFS time                  | Yes                 | Breast Cancer    | GPL96            |
| 10 | GSE6532           | 255         | tamoxifen                                                                                  | survival time             | Yes                 | Breast Cancer    | GPL96and97and570 |
| 11 | GSE1456           | 159         | cyclophosphamide<br>methotrexate<br>5-fluorouracil<br>megesterol<br>tamoxifen<br>goserelin | DFS time<br>Survival time | Yes                 | Breast Cancer    | GPL96and97       |
| 12 | GSE17538/GSE17536 | 244         | cyclophosphamide                                                                           | DFS time                  | Yes                 | Colon cancer     | GPL570           |
| 13 | GSE9891/GSE9899   | 285         | paclitaxel<br>cisplatin<br>carboplatin                                                     | Time to relapse           | Yes                 | Ovarian cancer   | GPL570           |
| 14 | GSE24080          | 340/214     | total therapy 2/3<br>Dexamethasone (0,0,0)<br>velcade (1,1,1)<br>thalidomide (0,0,0)       | Yes                       | Yes                 | Multiple myeloma | GPL570           |
| 15 | GSE10255          | 100/60      | methotrexate (1,1,1)<br>(two level of doses)                                               | white blood cell count    | NA                  | ALL              | GPL96            |

| ID | GEO Series     | No. of Pat. | treatment                                                                                                                                                      | clinical outcome | other clinical info | cancer type | platform    |
|----|----------------|-------------|----------------------------------------------------------------------------------------------------------------------------------------------------------------|------------------|---------------------|-------------|-------------|
| 16 | GSE2351/GSE635 | 129         | prednisolone (0,0,1)<br>vincristine (0,1,1)<br>daunorubicin (0,1,1)<br>asparaginase (0,1,1)                                                                    | LC50 value       | Yes                 | ALL         | GPL96       |
| 17 | GSE12995       | 175         | cyclophosphamide<br>cytarabine<br>mercaptopurine<br>vincristine<br>asparaginase<br>methotrexate<br>Dexamethasone<br>doxorubicin<br>thioguanine<br>prednisolone | Yes              | Yes                 | ALL         | GPL96       |
| 18 | GSE11877       | 207         | cyclophosphamide<br>cytarabine<br>mercaptopurine<br>vincristine<br>asparaginase<br>methotrexate<br>Dexamethasone<br>doxorubicin<br>thioguanine<br>prednisolone | Yes              | Yes                 | ALL         | GPL570      |
| 19 | GSE12417       | 163/79      | cytarabine<br>thioguanine<br>daunorubicin<br>cyclophosphamide<br>G-CSF<br>busulfan<br>cytarabine<br>daunorubicin<br>etoposide<br>valspodar<br>cyclophosphamide | Yes              | Yes                 | AML         | GPL96and570 |
| 20 | GSE10846       | 181/233     | doxorubicin<br>vincristine<br>prednisolone<br>cyclophosphamide<br>rituximab                                                                                    | Yes              | Yes                 | DLBCL       | GPL570      |

| ID | GEO Series        | No. of Pat. | treatment                                                                   | clinical outcome | other clinical info | cancer type           | platform |
|----|-------------------|-------------|-----------------------------------------------------------------------------|------------------|---------------------|-----------------------|----------|
| 21 | GSE11318          | 203         | doxorubicin<br>vincristine<br>prednisolone<br>cyclophosphamide              | Yes              | Yes                 | DLBCL                 | GPL570   |
| 22 | GSE17372/GSE10864 | 217         | doxorubicin<br>vincristine<br>cyclophosphamide<br>prednisolone<br>rituximab | Yes              | Yes                 | AIDS related lymphoma | GPL570   |

Drug regimen in red is not applicable to MPI prediction model.
